# Supplementary material for: Simulation of the Ozone Monitoring Instrument Aerosol Index using the NASA Goddard Earth Observing System Aerosol Reanalysis Products
Source: Copernicus journal article supplement (doi:10.5194/amt-2017-87), 2017-05-19
Supplement: Supplementary file 1 [file amt-2017-87-supplement.pdf]

# Simulation of the Ozone Monitoring Instrument Aerosol Index using the NASA Goddard Earth Observing System Aerosol Reanalysis Products

Peter R. Colarco<sup>1</sup>, Santiago Gassó<sup>2,3</sup>, Changwoo Ahn<sup>1,4</sup>, Virginie Buchard<sup>5,6</sup>, Arlindo M. da Silva<sup>5</sup>,  
5 Omar Torres<sup>1</sup>

<sup>1</sup>Atmospheric Chemistry and Dynamics Laboratory, NASA Goddard Space Flight Center, Greenbelt, MD, 20770, USA

<sup>2</sup>Climate and Radiation Laboratory, NASA Goddard Space Flight Center, Greenbelt, MD, 20770, USA

<sup>3</sup>GESTAR/Morgan State University, Baltimore, MD, 21251, USA

<sup>4</sup>Science Systems and Applications Inc., Lanham, MD, 20706, USA

10 <sup>5</sup>Global Modeling and Assimilation Office, NASA Goddard Space Flight Center, Greenbelt, MD, 20770, USA

<sup>6</sup>GESTAR/Universities Space Research Association, Columbia, MD, 21046, USA

*Correspondence to:* Peter R. Colarco (Peter.R.Colarco@nasa.gov)

Supplementary figures

a) MERRAero Aerosol Index (20070605)

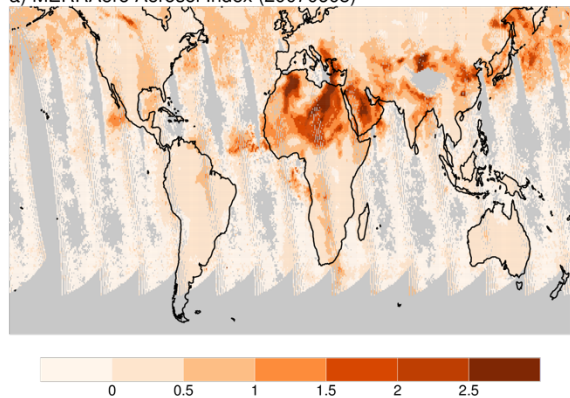

b) Surface Pressure Difference [hPa]: OMAERUV - MERRAero

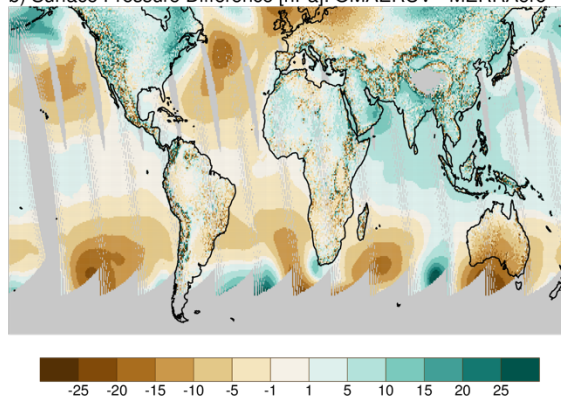

c) AI Difference: OMAERUV (own pressure) - MERRAero

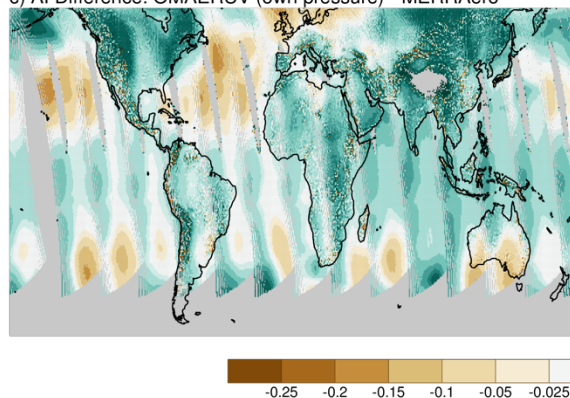

d) AI Difference: OMAERUV (MERRAero pressure) - MERRAero

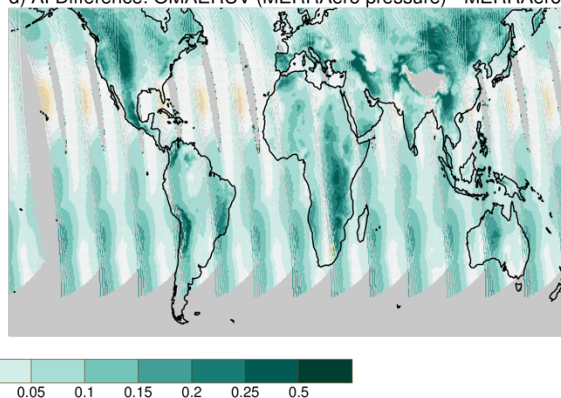

Figure S1: As in Figure 1, for June 5, 2007, but including all surface pressures.

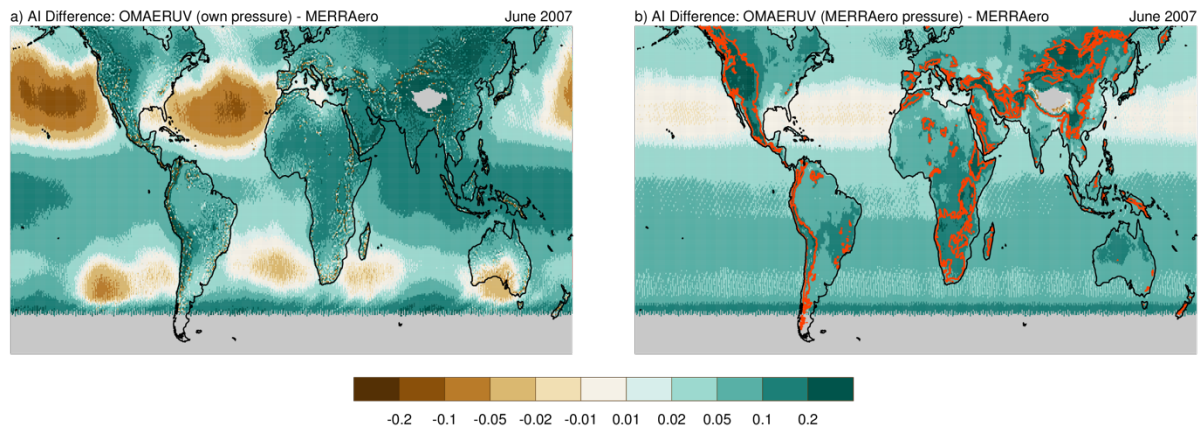

**Figure S2:** As in Figure 3 for June 2007, but including all surface pressures.

a) AI Difference: OMAERUV (MERRAero pressure) - MERRAero July 2007

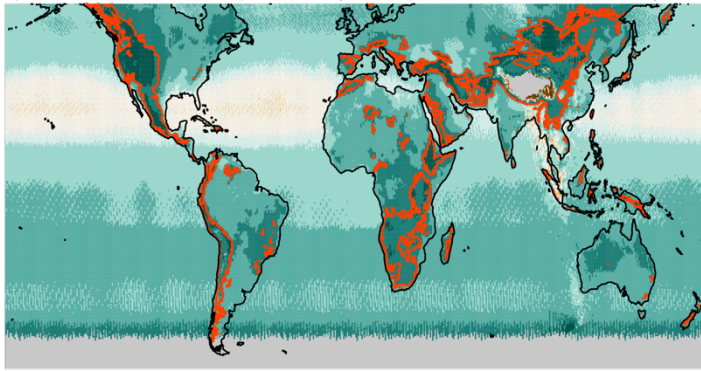

b) AI Difference: OMAERUV (MERRAero pressure) - MERRAero August 2007

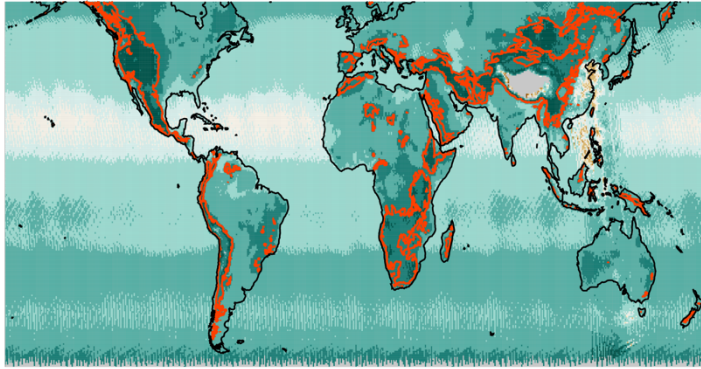

c) AI Difference: OMAERUV (MERRAero pressure) - MERRAero September 2007

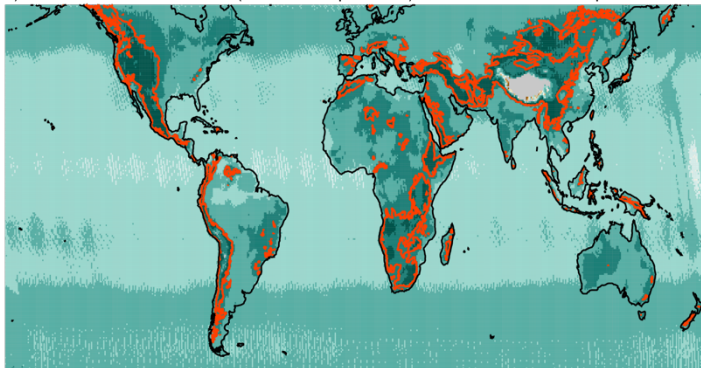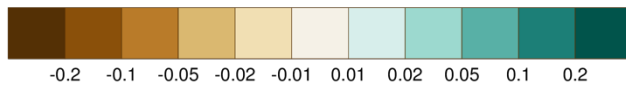

Figure S3: As in Figure 4, but including all surface pressures.
